# Supplementary material
Source: publisher site journal article supplement (https://www.dovepress.com/article/318139)
Supplement: Supplementary file 1 [file get_supplementary_file.php]

**APPENDIX: Questionnaire items, scales, and constructs**

| Questionnaire | |
| --- | --- |
| Items | Option |
| Sex | Men; Women |
| Age | 18–25; 26–30; 31–40; 41–50; 51–60; Above 60 |
| Income | Fill in the monthly income (RMB) |
| Education level | Associated bachelor’s degree; Bachelor’s degree; Master’s degree or above |
| Usage frequency | Several times each day; Several times each week; Several times each month; Never |
| Conducting WeChat business | Yes; No |
| Number of WeChat friends | Below 50; 51–500; 501–1,000; 1,001–3,000; Above 3,000 |
| Privacy concern, first-order construct: collection24 | |
| Items | Scale |
| It usually bothers me when online services (such as apps and online registration for VIPs) ask me for personal information. | 1 – *strongly agree*; 7 – *strongly disagree* |
| When online companies ask me for personal information, I sometimes think twice before providing it. | 1 – *strongly agree*; 7 – *strongly disagree* |
| It bothers me to give personal information to so many online companies. | 1 – *strongly agree*; 7 – *strongly disagree* |
| I’m concerned that online companies are collecting too much information about me. | 1 – *strongly agree*; 7 – *strongly disagree* |
| Privacy concern, first-order construct: control24 | |
| Items | Scale |
| Consumer online privacy refers to consumers’ right to exercise control and autonomy over decisions on how their information is collected, used, and shared. | 1 – *strongly agree*; 7 – *strongly disagree* |
| Consumers’ control of personal information lies at the heart of consumer privacy. | 1 – *strongly agree*; 7 – *strongly disagree* |
| I believe that online privacy is invaded when control is lost or unwillingly reduced as a result of a marketing transaction. | 1 – *strongly agree*; 7 – *strongly disagree* |
| Privacy concern, first-order construct: awareness24 | |
| Items | Scale |
| Companies seeking information online should disclose the way data are collected, processed, and used. | 1 – *strongly agree*; 7 – *strongly disagree* |
| A good consumer online privacy policy should have a clear and conspicuous disclosure. | 1 – *strongly agree*; 7 – *strongly disagree* |
| It is very important to me that I am aware and knowledgeable about how my personal information will be used. | 1 – *strongly agree*; 7 – *strongly disagree* |
| Psychological ownership, first-order construct: feeling at home5 | |
| Items | Scale |
| I feel a bit at home on my WeChat profile. | 1 – *strongly agree*; 7 – *strongly disagree* |
| I feel connected to my WeChat profile. | 1 – *strongly agree*; 7 – *strongly disagree* |
| I like my WeChat profile. | 1 – *strongly agree*; 7 – *strongly disagree* |
| I like being part of the WeChat community. | 1 – *strongly agree*; 7 – *strongly disagree* |
| Psychological ownership, first-order construct: identity5 | |
| Items | Scale |
| I like that WeChat gives me the possibility to make a good impression on others. | 1 – *strongly agree*; 7 – *strongly disagree* |
| I use WeChat to present myself in a good light. | 1 – *strongly agree*; 7 – *strongly disagree* |
| For me it is important that I present myself well on WeChat. | 1 – *strongly agree*; 7 – *strongly disagree* |
| Psychological ownership, first-order construct: efficacy5 | |
| Items | Scale |
| I believe that my WeChat profile stands out positively among other WeChat profiles. | 1 – *strongly agree*; 7 – *strongly disagree* |
| I think that I set high standards for WeChat profiles with my profile. | 1 – *strongly agree*; 7 – *strongly disagree* |
| I feel that I increase the quality of WeChat. | 1 – *strongly agree*; 7 – *strongly disagree* |
| I am sure that I contribute a lot to WeChat. | 1 – *strongly agree*; 7 – *strongly disagree* |
| Disclosure intimacy41 and self-constructed | |
| Items | Scale |
| My self-disclosure on WeChat has been stable since I started using this app. | 1 – *strongly agree*; 7 – *strongly disagree* |
| I often share photos of myself and my family and disclose how I really feel on WeChat without hesitation. | 1 – *strongly agree*; 7 – *strongly disagree* |
